# Supplementary material for: Upregulated astrocytic HDAC7 induces depression-like disorders via deacetylating PINK1 and inhibiting mitophagy
Source: Research Square preprint supplement (doi:10.21203/rs.3.rs-7723781/v1), 2025-10-15
Supplement: Supplementary file 1 [file 200033e07945298c93797a6f.docx]

**Supplementary information**


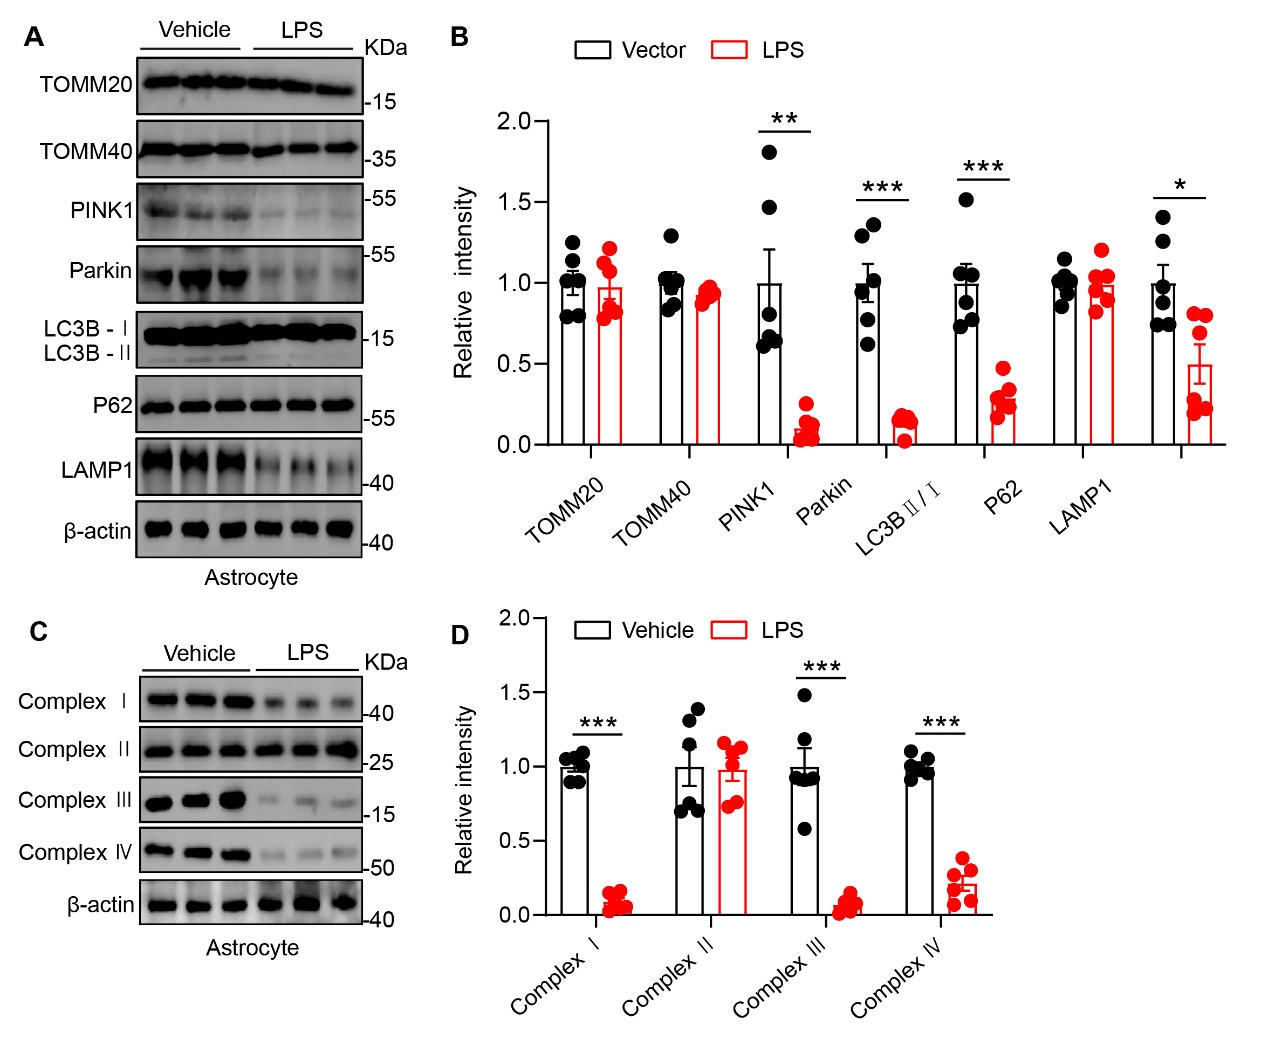


**Supplementary Figure 1 Impaired mitophagy and mitochondrial electron transport chain in LPS-stimulated astrocytes.**

(A and B) Western blotting analysis and quantification of hippocampal lysates probed for mitochondrial membrane proteins (TOMM20, TOMM40) and mitophagy-related markers (PINK1, Parkin, LC3B-I/II, p62, LAMP1) in primary cultured astrocytes treated with LPS or vehicle. N = 6 per group; unpaired Student’s t-test. (C and D) Western blotting analysis and quantification of mitochondrial electron transport chain complexes (I–IV) in primary cultured astrocytes treated with LPS or vehicle. N = 6 per group; unpaired Student’s t-test. Data are presented as mean ± SEM; *p < 0.05, **p < 0.01, ***p < 0.001.


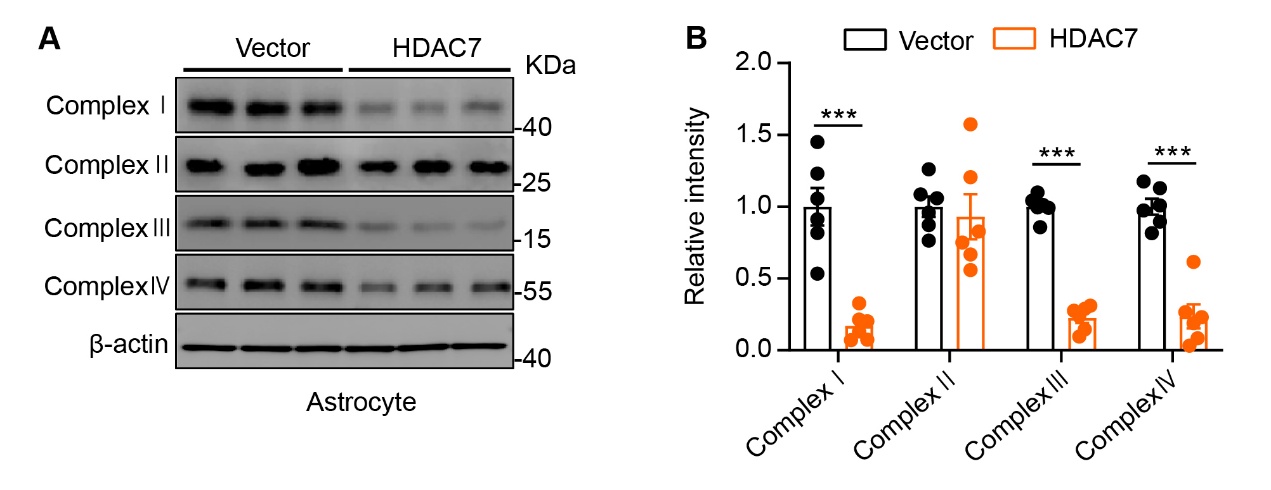


**Supplementary Figure 2 HDAC7 overexpression impairs mitochondrial electron transport chain in cultured astrocytes.**

(A and B) Western blotting analysis and quantification of mitochondrial respiratory chain complexes (I–IV) in primary cultured astrocytes overexpressed with HDAC7 or vector. N = 6 for each group, unpaired Student’s t test. Data are presented as the mean ± SEM, ****p* < 0.001.
